# Supplementary material
Source: publisher figshare collection journal article supplement (https://frontiersin.figshare.com/ndownloader/files/25592015)
Supplement: Supplementary file 1 [file 25592015]

**Table S3**. Additional crop characteristics for cassava grown at the Katana center: total root weight (combined weight of edible and non-edible roots) and stem weight at harvest. The impact of young leaf harvesting (33% or 50% leaf removal) on yield is assessed. Photosynthetic active radiation (PAR) is measured under the respective banana canopies or in the open field for the monocrops. Means in a column followed by the same letter are not significantly different from each other according to Tukey’s HSD test (p < 0.05). Standard deviations are provided between brackets.

|  | **Banana spacing** | **% prior leaf harvesting** | **Cassava** | | **PAR  (μmol/m2/s)** |
| --- | --- | --- | --- | --- | --- |
|  | **Total root weight (t/ha)** | **Total stem weight (t/ha)** |
| **Nshika fields** | |  |  |  |  |
|  | **2x2m** | 0 | 1.0de (±1.0) | 2.2c (±2.9) | 209c (±204) |
|  |  | 33 | 0.6de (±0.1) | 0.6c (±0.3) |  |
|  |  | 50 | 0.2e (±0.0) | 1.1c (±1.3) |  |
|  | **2x3m** | 0 | 1.6de (±0.9) | 3.4c (±0.3) | 475b (±321) |
|  |  | 33 | 1.4de (±0.6) | 0.8c (±0.1) |  |
|  |  | 50 | 1.1de (±0.7) | 1.1c (±0.1) |  |
|  | **3x3m** | 0 | 0.2e (±0.0) | 0.1c (±0.0) | 501b (±268) |
|  |  | 33 | 0.4de (±0.2) | 0.4c (±0.1) |  |
|  |  | 50 | 0.9de (±0.9) | 0.8c (±0.9) |  |
|  | **3x4m** | 0 | 5.1c (±0.9) | 9.0bc (±1.0) | 288c (±231) |
|  |  | 33 | 3.2cd (±0.8) | 3.5c (±0.8) |  |
|  |  | 50 | 3.0cde (±0.2) | 3.2c (±1.2) |  |
| **Monocrop** | | 0 | 17.0a (±3) | 50.6a (±41.5) | 1835a (±71) |
|  |  | 33 | 12.3b (±4) | 29.7ab (±6.5) | |
|  |  | 50 | 15.0ab (±1) | 33.0a (±4.4) |  |
|  |  | LSD | 2.9 | 21.1 | 105 |
|  |  | Fpr | 0.452 | 0.932 | 0.001 |
